# Supplementary material
Source: MDPI journal article supplement (https://www.mdpi.com/1999-4907/13/1/19)
Supplement: s1 [file s1]

## Supplementary Table S1

**Table S1.** The 280 United States forest tree species included in the assessment, along with the number of Forest Inventory and Analysis (FIA) plots on which each was inventoried, the 99.9<sup>th</sup> percentile diameter, the small tree-large tree diameter cutoff (in centimeters), the estimated number of small and large stems based on the FIA sample design, the percent of all trees within the small tree size class, the number of provisional seed zones containing at least five FIA plots of the species, and the number and percent of these that may be at risk of losing genetic variation because of low levels of regeneration. Species indicated with \* may be at risk of genetic degradation across their distributions (see Table 2).

| Species                      | Plots  | 99.9th | Cut- | Estimated stems |               | %     | Seed zones |         |           |
|------------------------------|--------|--------|------|-----------------|---------------|-------|------------|---------|-----------|
|                              |        | %tile  | off  | Small           | Large         | Small | n          | At risk | % at risk |
| <i>Abies amabilis</i>        | 1,898  | 74.7   | 12.7 | 7,976,719,545   | 411,379,075   | 95.1  | 7          | 0       | 0.0       |
| <i>Abies balsamea</i>        | 9,908  | 26.7   | 5.3  | 51,911,130,947  | 7,712,873,067 | 87.1  | 27         | 3       | 11.1      |
| <i>Abies concolor</i>        | 3,433  | 88.9   | 12.7 | 6,888,287,872   | 818,980,354   | 89.4  | 55         | 4       | 7.3       |
| <i>Abies fraseri</i>         | 15     | 30.0   | 6.0  | 73,945,023      | 11,217,326    | 86.8  | 1          | 0       | .         |
| <i>Abies grandis</i>         | 4,354  | 67.3   | 12.7 | 11,633,557,840  | 686,818,076   | 94.4  | 46         | 0       | 0.0       |
| <i>Abies lasiocarpa</i>      | 6,257  | 44.7   | 8.9  | 43,096,510,330  | 2,749,531,324 | 94.0  | 53         | 0       | 0.0       |
| <i>Abies magnifica</i>       | 743    | 113.8  | 12.7 | 2,068,653,806   | 183,525,084   | 91.9  | 13         | 1       | 7.7       |
| <i>Abies procera</i>         | 628    | 101.6  | 12.7 | 287,125,139     | 58,925,881    | 83.0  | 4          | 1       | .         |
| <i>Acacia farnesiana</i>     | 282    | 44.7   | 8.9  | 490,057,349     | 56,873,944    | 89.6  | 8          | 1       | 12.5      |
| <i>Acer barbatum</i>         | 1,382  | 36.8   | 7.4  | 2,180,896,080   | 117,397,338   | 94.9  | 15         | 2       | 13.3      |
| <i>Acer glabrum</i>          | 234    | 35.6   | 7.1  | 160,686,817     | 10,419,127    | 93.9  | 13         | 1       | 7.7       |
| <i>Acer grandidentatum</i>   | 229    | 29.5   | 5.9  | 2,408,549,493   | 283,179,813   | 89.5  | 9          | 1       | 11.1      |
| <i>Acer leucoderme</i>       | 10     | 32.0   | 6.4  | 10,289,799      | 176,096       | 98.3  | 1          | 0       | .         |
| <i>Acer macrophyllum</i>     | 1,461  | 84.3   | 12.7 | 596,185,185     | 171,253,851   | 77.7  | 25         | 9       | 36.0      |
| <i>Acer negundo</i>          | 4,854  | 48.0   | 9.6  | 4,782,120,350   | 434,950,918   | 91.7  | 62         | 6       | 9.7       |
| <i>Acer nigrum</i>           | 129    | 62.0   | 12.4 | 96,621,552      | 12,663,635    | 88.4  | 11         | 0       | 0.0       |
| <i>Acer pensylvanicum</i>    | 4,622  | 15.7   | 3.1  | 11,410,831,894  | 1,600,827,782 | 87.7  | 30         | 0       | 0.0       |
| <i>Acer rubrum</i>           | 41,963 | 49.0   | 9.8  | 79,276,008,712  | 6,855,982,164 | 92.0  | 87         | 6       | 6.9       |
| <i>Acer saccharinum</i>      | 1,141  | 87.9   | 12.7 | 857,277,292     | 198,981,552   | 81.2  | 27         | 13      | 48.1      |
| <i>Acer saccharum</i>        | 16,541 | 51.3   | 10.3 | 48,631,369,458  | 3,095,215,544 | 94.0  | 60         | 2       | 3.3       |
| <i>Aesculus californica</i>  | 139    | 42.4   | 8.5  | 155,730,792     | 28,573,277    | 84.5  | 9          | 1       | 11.1      |
| <i>Aesculus flava</i>        | 899    | 54.4   | 10.9 | 703,499,104     | 55,846,472    | 92.6  | 15         | 1       | 6.7       |
| <i>Aesculus glabra</i>       | 523    | 36.1   | 7.2  | 609,226,007     | 61,917,746    | 90.8  | 13         | 1       | 7.7       |
| <i>Alnus rhombifolia</i>     | 100    | 73.7   | 12.7 | 37,808,192      | 9,801,056     | 79.4  | 7          | 4       | 57.1      |
| <i>Alnus rubra</i> *         | 1,991  | 64.0   | 12.7 | 956,957,735     | 393,555,656   | 70.9  | 21         | 14      | 66.7      |
| <i>Amelanchier arborea</i>   | 10,552 | 18.3   | 3.7  | 16,287,991,394  | 686,655,903   | 96.0  | 72         | 2       | 2.8       |
| <i>Annona glabra</i>         | 17     | 27.9   | 5.6  | 55,899,119      | 3,988,694     | 93.3  | 2          | 0       | .         |
| <i>Arbutus arizonica</i>     | 8      | 50.0   | 10.0 | 7,841,885       | 592,235       | 93.0  | 1          | 0       | .         |
| <i>Arbutus menziesii</i>     | 1,254  | 73.7   | 12.7 | 948,090,428     | 172,246,504   | 84.6  | 26         | 5       | 19.2      |
| <i>Arbutus xalapensis</i>    | 9      | 40.1   | 8.0  | 3,951,209       | 174,619       | 95.8  | 1          | 0       | .         |
| <i>Avicennia germinans</i>   | 29     | 16.5   | 3.3  | 709,940,911     | 63,062,580    | 91.8  | 2          | 0       | .         |
| <i>Betula alleghaniensis</i> | 6,746  | 53.3   | 10.7 | 10,413,771,484  | 776,492,979   | 93.1  | 37         | 4       | 10.8      |

|                                   |        |       |      |                |               |      |    |    |      |
|-----------------------------------|--------|-------|------|----------------|---------------|------|----|----|------|
| <i>Betula lenta</i>               | 4,427  | 44.5  | 8.9  | 7,721,689,674  | 750,133,824   | 91.1 | 28 | 1  | 3.6  |
| <i>Betula nigra</i>               | 830    | 59.9  | 12.0 | 483,330,657    | 75,637,020    | 86.5 | 23 | 8  | 34.8 |
| <i>Betula occidentalis</i>        | 47     | 25.4  | 5.1  | 158,660,982    | 14,306,622    | 91.7 | 3  | 2  | .    |
| <i>Betula papyrifera</i>          | 8,948  | 40.9  | 8.2  | 6,190,559,898  | 1,147,186,225 | 84.4 | 46 | 17 | 37.0 |
| <i>Betula populifolia</i> *       | 751    | 20.6  | 4.1  | 989,927,141    | 379,812,097   | 72.3 | 20 | 13 | 65.0 |
| <i>Bursera simaruba</i> *         | 5      | 26.7  | 5.3  | 453,118        | 714,342       | 38.8 | .  | .  | .    |
| <i>Calocedrus decurrens</i>       | 1,849  | 87.9  | 12.7 | 4,675,101,625  | 263,044,253   | 94.7 | 26 | 2  | 7.7  |
| <i>Carpinus caroliniana</i>       | 7,272  | 22.1  | 4.4  | 15,048,219,576 | 1,722,985,432 | 89.7 | 58 | 7  | 12.1 |
| <i>Carya alba</i>                 | 11,019 | 48.3  | 9.7  | 7,846,694,000  | 659,281,121   | 92.2 | 49 | 5  | 10.2 |
| <i>Carya aquatica</i>             | 550    | 66.8  | 12.7 | 259,165,704    | 43,628,545    | 85.6 | 13 | 3  | 23.1 |
| <i>Carya cordiformis</i>          | 5,836  | 52.1  | 10.4 | 4,302,114,835  | 284,932,472   | 93.8 | 59 | 2  | 3.4  |
| <i>Carya glabra</i>               | 10,781 | 53.1  | 10.6 | 7,142,262,080  | 619,471,613   | 92.0 | 49 | 7  | 14.3 |
| <i>Carya illinoensis</i>          | 1,149  | 84.6  | 12.7 | 703,336,776    | 89,847,382    | 88.7 | 26 | 2  | 7.7  |
| <i>Carya laciniosa</i>            | 267    | 69.6  | 12.7 | 53,065,259     | 17,248,875    | 75.5 | 8  | 5  | 62.5 |
| <i>Carya ovalis</i> *             | 68     | 56.1  | 11.2 | 8,514,642      | 3,815,860     | 69.1 | 2  | 2  | .    |
| <i>Carya ovata</i>                | 5,867  | 54.9  | 11.0 | 2,893,110,845  | 456,821,621   | 86.4 | 47 | 8  | 17.0 |
| <i>Carya pallida</i>              | 165    | 47.5  | 9.5  | 120,394,733    | 9,834,752     | 92.4 | 8  | 1  | 12.5 |
| <i>Carya texana</i>               | 3,619  | 40.6  | 8.1  | 3,918,460,735  | 406,232,336   | 90.6 | 25 | 2  | 8.0  |
| <i>Castanea dentata</i>           | 500    | 14.7  | 2.9  | 323,687,729    | 44,647,756    | 87.9 | 15 | 3  | 20.0 |
| <i>Castanea pumila</i>            | 92     | 13.0  | 2.6  | 98,822,520     | 2,374,317     | 97.7 | 7  | 0  | 0.0  |
| <i>Castanea pumila ozarkensis</i> | 27     | 26.7  | 5.3  | 12,020,250     | 2,392,433     | 83.4 | 2  | 0  | .    |
| <i>Catalpa bignonioides</i>       | 38     | 41.9  | 8.4  | 10,024,316     | 2,858,234     | 77.8 | 2  | 1  | .    |
| <i>Catalpa speciosa</i>           | 64     | 72.9  | 12.7 | 23,371,518     | 4,929,246     | 82.6 | 5  | 2  | 40.0 |
| <i>Celtis laevigata</i>           | 4,234  | 49.0  | 9.8  | 6,434,924,918  | 415,334,347   | 93.9 | 36 | 1  | 2.8  |
| <i>Celtis occidentalis</i>        | 6,566  | 45.2  | 9.0  | 12,725,001,038 | 467,753,068   | 96.5 | 57 | 2  | 3.5  |
| <i>Cercis canadensis</i>          | 4,555  | 18.5  | 3.7  | 6,483,619,198  | 854,015,834   | 88.4 | 39 | 4  | 10.3 |
| <i>Cercocarpus ledifolius</i> *   | 912    | 62.2  | 12.4 | 752,320,781    | 260,407,121   | 74.3 | 29 | 15 | 51.7 |
| <i>Chamaecyparis lawsoniana</i>   | 117    | 106.7 | 12.7 | 133,298,619    | 10,432,612    | 92.7 | 4  | 0  | .    |
| <i>Chamaecyparis nootkatensis</i> | 241    | 64.8  | 12.7 | 566,139,864    | 31,663,108    | 94.7 | 4  | 0  | .    |
| <i>Chamaecyparis thyoides</i>     | 126    | 49.8  | 10.0 | 292,819,418    | 37,809,959    | 88.6 | 5  | 1  | 20.0 |
| <i>Chrysopsis chrysophylla</i>    | 852    | 43.2  | 8.6  | 1,157,013,569  | 60,891,082    | 95.0 | 17 | 0  | 0.0  |
| <i>Cladrastis kentukea</i>        | 14     | 37.8  | 7.6  | 4,599,790      | 487,028       | 90.4 | .  | .  | .    |
| <i>Condalia hookeri</i> *         | 278    | 35.8  | 7.2  | 154,649,389    | 75,831,092    | 67.1 | 7  | 6  | 85.7 |
| <i>Conocarpus erectus</i>         | 10     | 39.4  | 7.9  | 40,979,192     | 4,950,491     | 89.2 | .  | .  | .    |
| <i>Cornus florida</i>             | 9,093  | 17.5  | 3.5  | 8,203,369,716  | 2,158,741,916 | 79.2 | 45 | 20 | 44.4 |
| <i>Cornus nuttallii</i>           | 388    | 20.6  | 4.1  | 518,014,259    | 101,628,678   | 83.6 | 13 | 4  | 30.8 |
| <i>Cotinus obovatus</i>           | 18     | 23.1  | 4.6  | 14,081,996     | 2,152,500     | 86.7 | 1  | 0  | .    |
| <i>Crataegus crus galli</i>       | 64     | 16.0  | 3.2  | 69,404,647     | 22,637,418    | 75.4 | 3  | 2  | .    |
| <i>Crataegus mollis</i>           | 36     | 31.8  | 6.4  | 25,814,770     | 3,167,977     | 89.1 | 1  | 0  | .    |
| <i>Cupressus arizonica</i>        | 10     | 52.6  | 10.5 | 19,045,725     | 4,395,496     | 81.2 | .  | .  | .    |
| <i>Cupressus sargentii</i>        | 6      | 33.8  | 6.8  | 35,867,324     | 6,214,203     | 85.2 | .  | .  | .    |
| <i>Diospyros virginiana</i>       | 7,922  | 27.2  | 5.4  | 7,286,732,726  | 433,419,501   | 94.4 | 42 | 0  | 0.0  |

|                                |        |       |      |                |               |      |    |    |       |
|--------------------------------|--------|-------|------|----------------|---------------|------|----|----|-------|
| <i>Ebenopsis ebano</i> *       | 7      | 13.5  | 2.7  | 3,143,280      | 7,776,171     | 28.8 | 1  | 1  | .     |
| <i>Ehretia anacua</i>          | 21     | 27.2  | 5.4  | 36,322,875     | 7,266,398     | 83.3 | 1  | 0  | .     |
| <i>Fagus grandifolia</i>       | 12,790 | 48.5  | 9.7  | 39,038,471,713 | 1,601,091,161 | 96.1 | 60 | 1  | 1.7   |
| <i>Ficus aurea</i>             | 16     | 36.6  | 7.3  | 10,256,444     | 2,507,648     | 80.4 | 1  | 0  | .     |
| <i>Fraxinus americana</i>      | 16,067 | 46.5  | 9.3  | 37,288,092,463 | 1,126,779,447 | 97.1 | 77 | 2  | 2.6   |
| <i>Fraxinus caroliniana</i>    | 121    | 36.6  | 7.3  | 154,069,800    | 41,968,219    | 78.6 | 6  | 3  | 50.0  |
| <i>Fraxinus latifolia</i>      | 119    | 66.5  | 12.7 | 198,817,097    | 13,295,556    | 93.7 | 7  | 1  | 14.3  |
| <i>Fraxinus nigra</i>          | 4,761  | 34.0  | 6.8  | 10,922,846,789 | 849,513,881   | 92.8 | 28 | 2  | 7.1   |
| <i>Fraxinus pennsylvanica</i>  | 13,380 | 47.0  | 9.4  | 25,275,840,283 | 1,153,763,180 | 95.6 | 86 | 4  | 4.7   |
| <i>Fraxinus profunda</i>       | 91     | 58.4  | 11.7 | 91,530,033     | 18,857,712    | 82.9 | 5  | 2  | 40.0  |
| <i>Fraxinus quadrangulata</i>  | 449    | 40.9  | 8.2  | 1,033,677,625  | 19,732,702    | 98.1 | 9  | 0  | 0.0   |
| <i>Fraxinus texensis</i>       | 93     | 30.2  | 6.0  | 259,395,269    | 15,103,846    | 94.5 | 4  | 0  | .     |
| <i>Fraxinus velutina</i>       | 33     | 22.9  | 4.6  | 94,298,635     | 1,974,703     | 97.9 | 1  | 0  | .     |
| <i>Gleditsia aquatica</i>      | 52     | 52.3  | 10.5 | 14,535,741     | 3,005,193     | 82.9 | 4  | 1  | .     |
| <i>Gleditsia triacanthos</i>   | 2,076  | 57.9  | 11.6 | 1,195,955,343  | 139,423,190   | 89.6 | 37 | 5  | 13.5  |
| <i>Gordonia lasianthus</i>     | 502    | 41.1  | 8.2  | 1,258,385,193  | 151,037,331   | 89.3 | 5  | 0  | 0.0   |
| <i>Gymnocladus dioicus</i>     | 95     | 57.7  | 11.5 | 41,804,352     | 5,669,262     | 88.1 | 5  | 2  | 40.0  |
| <i>Halesia carolina</i>        | 271    | 44.7  | 8.9  | 250,524,881    | 12,354,182    | 95.3 | 8  | 0  | 0.0   |
| <i>Halesia diptera</i> *       | 25     | 24.1  | 4.8  | 21,505,462     | 8,121,802     | 72.6 | 2  | 1  | .     |
| <i>Ilex opaca</i>              | 6,678  | 25.1  | 5.0  | 8,163,029,932  | 1,067,265,474 | 88.4 | 33 | 3  | 9.1   |
| <i>Juglans cinerea</i>         | 300    | 57.9  | 11.6 | 38,370,570     | 9,563,392     | 80.0 | 18 | 7  | 38.9  |
| <i>Juglans major</i>           | 22     | 47.5  | 9.5  | 35,071,825     | 1,993,836     | 94.6 | .  | .  | .     |
| <i>Juglans microcarpa</i>      | 24     | 43.7  | 8.7  | 13,698,012     | 2,756,593     | 83.2 | 2  | 1  | .     |
| <i>Juglans nigra</i>           | 4,861  | 68.1  | 12.7 | 1,121,698,243  | 331,996,477   | 77.2 | 50 | 19 | 38.0  |
| <i>Juniperus ashei</i>         | 1,517  | 54.1  | 10.8 | 5,133,281,530  | 904,992,720   | 85.0 | 14 | 1  | 7.1   |
| <i>Juniperus californica</i> * | 93     | 104.6 | 12.7 | 20,479,125     | 18,888,399    | 52.0 | 6  | 6  | 100.0 |
| <i>Juniperus coahuilensis</i>  | 358    | 71.9  | 12.7 | 244,306,222    | 77,942,964    | 75.8 | 14 | 9  | 64.3  |
| <i>Juniperus deppeana</i> *    | 1,181  | 94.5  | 12.7 | 478,038,092    | 218,766,045   | 68.6 | 19 | 16 | 84.2  |
| <i>Juniperus monosperma</i> *  | 2,381  | 85.6  | 12.7 | 915,076,545    | 784,121,991   | 53.9 | 40 | 37 | 92.5  |
| <i>Juniperus occidentalis</i>  | 1,579  | 91.7  | 12.7 | 710,589,319    | 219,652,389   | 76.4 | 29 | 16 | 55.2  |
| <i>Juniperus osteosperma</i> * | 5,192  | 93.5  | 12.7 | 1,705,042,053  | 1,852,085,663 | 47.9 | 56 | 56 | 100.0 |
| <i>Juniperus pinchotii</i>     | 897    | 51.1  | 10.2 | 985,463,686    | 290,583,857   | 77.2 | 8  | 3  | 37.5  |
| <i>Juniperus scopulorum</i>    | 2,449  | 68.8  | 12.7 | 1,768,936,930  | 443,274,255   | 80.0 | 49 | 22 | 44.9  |
| <i>Juniperus virginiana</i>    | 12,210 | 38.6  | 7.7  | 15,415,212,117 | 2,099,943,947 | 88.0 | 72 | 10 | 13.9  |
| <i>Laguncularia racemosa</i>   | 26     | 25.4  | 5.1  | 265,604,738    | 35,256,696    | 88.3 | 1  | 0  | .     |
| <i>Larix laricina</i>          | 2,373  | 40.9  | 8.2  | 2,774,731,223  | 585,538,095   | 82.6 | 22 | 5  | 22.7  |
| <i>Larix lyallii</i>           | 71     | 65.0  | 12.7 | 145,218,792    | 11,925,913    | 92.4 | 4  | 0  | .     |
| <i>Larix occidentalis</i>      | 2,831  | 77.7  | 12.7 | 1,853,419,784  | 295,732,761   | 86.2 | 27 | 4  | 14.8  |
| <i>Liquidambar styraciflua</i> | 19,703 | 48.5  | 9.7  | 40,900,218,150 | 3,323,622,117 | 92.5 | 43 | 2  | 4.7   |
| <i>Liriodendron tulipifera</i> | 12,772 | 70.9  | 12.7 | 12,294,770,030 | 1,507,358,889 | 89.1 | 42 | 8  | 19.0  |
| <i>Lithocarpus densiflorus</i> | 1,128  | 58.2  | 11.6 | 5,469,050,595  | 427,983,660   | 92.7 | 16 | 0  | 0.0   |
| <i>Maclura pomifera</i> *      | 1,283  | 60.7  | 12.1 | 500,698,545    | 185,376,403   | 73.0 | 26 | 16 | 61.5  |

|                             |        |       |      |                |               |      |    |    |      |
|-----------------------------|--------|-------|------|----------------|---------------|------|----|----|------|
| <i>Magnolia acuminata</i>   | 1,341  | 58.7  | 11.7 | 498,574,778    | 56,493,102    | 89.8 | 26 | 1  | 3.8  |
| <i>Magnolia fraseri</i>     | 597    | 50.3  | 10.1 | 304,960,638    | 37,849,685    | 89.0 | 10 | 0  | 0.0  |
| <i>Magnolia grandiflora</i> | 816    | 56.4  | 11.3 | 499,876,191    | 50,422,243    | 90.8 | 7  | 0  | 0.0  |
| <i>Magnolia macrophylla</i> | 251    | 30.2  | 6.0  | 158,610,052    | 40,314,077    | 79.7 | 10 | 5  | 50.0 |
| <i>Magnolia tripetala</i>   | 137    | 22.4  | 4.5  | 104,041,380    | 27,738,696    | 79.0 | 9  | 4  | 44.4 |
| <i>Magnolia virginiana</i>  | 3,168  | 46.7  | 9.3  | 3,759,469,000  | 382,869,664   | 90.8 | 13 | 0  | 0.0  |
| <i>Malus angustifolia</i>   | 90     | 17.5  | 3.5  | 71,916,420     | 22,021,328    | 76.6 | 4  | 0  | .    |
| <i>Malus coronaria</i> *    | 55     | 25.4  | 5.1  | 48,212,777     | 16,987,961    | 73.9 | 2  | 1  | .    |
| <i>Malus fusca</i>          | 60     | 23.9  | 4.8  | 155,176,319    | 16,309,582    | 90.5 | 3  | 0  | .    |
| <i>Metopium toxiferum</i>   | 5      | 19.1  | 3.8  | 52,179,068     | 2,364,758     | 95.7 | .  | .  | .    |
| <i>Morus microphylla</i> *  | 5      | 19.3  | 3.9  | 909,545        | 680,855       | 57.2 | .  | .  | .    |
| <i>Morus rubra</i>          | 2,689  | 50.8  | 10.2 | 1,187,238,342  | 134,850,786   | 89.8 | 44 | 3  | 6.8  |
| <i>Nyssa aquatica</i> *     | 543    | 76.7  | 12.7 | 274,436,885    | 212,879,335   | 56.3 | 10 | 9  | 90.0 |
| <i>Nyssa biflora</i>        | 2,616  | 56.6  | 11.3 | 2,172,914,443  | 614,010,097   | 78.0 | 10 | 4  | 40.0 |
| <i>Nyssa ogeche</i> *       | 55     | 67.6  | 12.7 | 19,908,868     | 9,206,676     | 68.4 | 1  | 1  | .    |
| <i>Nyssa sylvatica</i>      | 15,401 | 44.7  | 8.9  | 14,608,348,460 | 1,158,328,185 | 92.7 | 55 | 11 | 20.0 |
| <i>Ostrya virginiana</i>    | 10,954 | 21.1  | 4.2  | 20,639,194,414 | 2,505,419,704 | 89.2 | 77 | 6  | 7.8  |
| <i>Oxydendrum arboreum</i>  | 6,048  | 33.5  | 6.7  | 4,867,877,629  | 1,060,970,305 | 82.1 | 24 | 6  | 25.0 |
| <i>Persea borbonia</i>      | 2,673  | 22.6  | 4.5  | 5,842,905,089  | 356,920,169   | 94.2 | 11 | 0  | 0.0  |
| <i>Picea breweriana</i>     | 10     | 85.1  | 12.7 | 8,626,107      | 696,456       | 92.5 | 1  | 0  | .    |
| <i>Picea engelmannii</i>    | 5,690  | 70.4  | 12.7 | 10,025,943,007 | 1,450,345,830 | 87.4 | 51 | 3  | 5.9  |
| <i>Picea glauca</i>         | 3,950  | 46.0  | 9.2  | 2,335,240,236  | 367,854,724   | 86.4 | 28 | 7  | 25.0 |
| <i>Picea mariana</i>        | 3,124  | 26.7  | 5.3  | 9,616,459,631  | 1,962,686,324 | 83.0 | 13 | 1  | 7.7  |
| <i>Picea pungens</i>        | 264    | 63.2  | 12.6 | 248,230,889    | 55,341,893    | 81.8 | 13 | 6  | 46.2 |
| <i>Picea rubens</i>         | 3,811  | 41.9  | 8.4  | 13,810,745,447 | 1,167,641,981 | 92.2 | 17 | 0  | 0.0  |
| <i>Picea sitchensis</i>     | 423    | 104.9 | 12.7 | 191,316,825    | 42,444,699    | 81.8 | 7  | 2  | 28.6 |
| <i>Pinus albicaulis</i>     | 1,507  | 48.8  | 9.8  | 3,695,896,419  | 390,674,772   | 90.4 | 26 | 1  | 3.8  |
| <i>Pinus aristata</i> *     | 140    | 67.1  | 12.7 | 80,046,751     | 27,964,956    | 74.1 | 7  | 5  | 71.4 |
| <i>Pinus attenuata</i>      | 141    | 41.7  | 8.3  | 693,787,539    | 27,269,221    | 96.2 | 7  | 2  | 28.6 |
| <i>Pinus balfouriana</i> *  | 23     | 140.2 | 12.7 | 3,667,384      | 4,781,293     | 43.4 | 1  | 1  | .    |
| <i>Pinus banksiana</i>      | 1,339  | 39.4  | 7.9  | 1,184,150,948  | 351,722,319   | 77.1 | 9  | 6  | 66.7 |
| <i>Pinus cembroides</i>     | 71     | 45.7  | 9.1  | 61,965,213     | 18,652,485    | 76.9 | 6  | 4  | 66.7 |
| <i>Pinus clausa</i>         | 241    | 39.6  | 7.9  | 506,193,595    | 149,987,301   | 77.1 | 3  | 1  | .    |
| <i>Pinus contorta</i>       | 7,370  | 49.0  | 9.8  | 24,195,860,582 | 3,927,860,675 | 86.0 | 69 | 23 | 33.3 |
| <i>Pinus coulteri</i>       | 20     | 91.4  | 12.7 | 6,781,534      | 1,356,297     | 83.3 | 1  | 1  | .    |
| <i>Pinus discolor</i>       | 48     | 46.2  | 9.2  | 52,240,944     | 12,575,313    | 80.6 | 4  | 1  | .    |
| <i>Pinus echinata</i>       | 5,143  | 55.6  | 11.1 | 2,749,779,169  | 816,260,364   | 77.1 | 31 | 21 | 67.7 |
| <i>Pinus edulis</i>         | 5,149  | 55.9  | 11.2 | 5,361,510,680  | 1,618,826,063 | 76.8 | 56 | 27 | 48.2 |
| <i>Pinus elliotii</i> *     | 3,376  | 51.8  | 10.4 | 3,803,976,324  | 1,784,082,874 | 68.1 | 11 | 8  | 72.7 |
| <i>Pinus flexilis</i>       | 1,120  | 63.8  | 12.7 | 1,053,770,775  | 157,410,564   | 87.0 | 29 | 6  | 20.7 |
| <i>Pinus glabra</i>         | 415    | 68.6  | 12.7 | 272,980,028    | 24,860,940    | 91.7 | 6  | 0  | 0.0  |
| <i>Pinus jeffreyi</i> *     | 785    | 121.2 | 12.7 | 303,719,657    | 162,367,673   | 65.2 | 21 | 17 | 81.0 |

|                                        |        |       |      |                |                |      |     |    |       |
|----------------------------------------|--------|-------|------|----------------|----------------|------|-----|----|-------|
| <i>Pinus lambertiana</i>               | 1,356  | 132.6 | 12.7 | 576,108,653    | 67,092,462     | 89.6 | 26  | 2  | 7.7   |
| <i>Pinus leiophylla</i> *              | 13     | 49.8  | 10.0 | 2,291,034      | 2,086,389      | 52.3 | 1   | 0  | .     |
| <i>Pinus longaeva</i> *                | 33     | 127.3 | 12.7 | 4,036,177      | 8,117,168      | 33.2 | 3   | 3  | .     |
| <i>Pinus monophylla</i>                | 2,170  | 62.5  | 12.5 | 2,766,176,267  | 772,903,537    | 78.2 | 36  | 13 | 36.1  |
| <i>Pinus monticola</i>                 | 1,460  | 99.3  | 12.7 | 965,304,235    | 63,817,957     | 93.8 | 29  | 1  | 3.4   |
| <i>Pinus muricata</i> *                | 11     | 101.1 | 12.7 | .              | 3,201,331      | 0.0  | 1   | 1  | .     |
| <i>Pinus palustris</i> *               | 2,019  | 54.6  | 10.9 | 1,343,159,776  | 495,078,052    | 73.1 | 10  | 7  | 70.0  |
| <i>Pinus ponderosa</i>                 | 11,350 | 84.6  | 12.7 | 9,766,475,213  | 2,417,558,258  | 80.2 | 115 | 59 | 51.3  |
| <i>Pinus pungens</i> *                 | 196    | 48.3  | 9.7  | 33,893,343     | 21,511,606     | 61.2 | 5   | 5  | 100.0 |
| <i>Pinus radiata</i> *                 | 7      | 99.3  | 12.7 | 805,720        | 2,256,087      | 26.3 | .   | .  | .     |
| <i>Pinus remota</i> *                  | 32     | 44.5  | 8.9  | 31,546,173     | 11,605,019     | 73.1 | 2   | 2  | .     |
| <i>Pinus resinosa</i> *                | 2,358  | 59.4  | 11.9 | 651,585,247    | 592,268,113    | 52.4 | 30  | 28 | 93.3  |
| <i>Pinus rigida</i> *                  | 917    | 52.8  | 10.6 | 333,647,542    | 188,912,475    | 63.8 | 17  | 11 | 64.7  |
| <i>Pinus sabiniana</i>                 | 293    | 90.9  | 12.7 | 72,759,667     | 23,005,132     | 76.0 | 14  | 8  | 57.1  |
| <i>Pinus serotina</i> *                | 386    | 60.7  | 12.1 | 204,557,934    | 75,901,847     | 72.9 | 4   | 3  | .     |
| <i>Pinus strobiformis</i>              | 160    | 74.4  | 12.7 | 61,802,151     | 17,867,582     | 77.6 | 7   | 1  | 14.3  |
| <i>Pinus strobus</i>                   | 8,656  | 69.6  | 12.7 | 13,471,232,976 | 1,080,908,265  | 92.6 | 53  | 6  | 11.3  |
| <i>Pinus taeda</i>                     | 18,674 | 55.9  | 11.2 | 41,563,303,017 | 10,732,270,604 | 79.5 | 38  | 19 | 50.0  |
| <i>Pinus virginiana</i>                | 3,429  | 44.5  | 8.9  | 3,219,973,989  | 746,305,701    | 81.2 | 24  | 7  | 29.2  |
| <i>Pinus washoensis</i>                | 6      | 89.4  | 12.7 | 3,585,384      | 1,129,075      | 76.1 | .   | .  | .     |
| <i>Planera aquatica</i>                | 272    | 36.6  | 7.3  | 378,009,389    | 104,272,663    | 78.4 | 11  | 6  | 54.5  |
| <i>Platanus occidentalis</i>           | 2,630  | 91.4  | 12.7 | 722,428,019    | 176,522,282    | 80.4 | 34  | 18 | 52.9  |
| <i>Platanus racemosa</i> *             | 12     | 116.1 | 12.7 | .              | 568,110        | 0.0  | .   | .  | .     |
| <i>Platanus wrightii</i> *             | 5      | 51.6  | 10.3 | 846,542        | 432,163        | 66.2 | .   | .  | .     |
| <i>Populus angustifolia</i>            | 82     | 73.2  | 12.7 | 129,969,676    | 13,645,029     | 90.5 | 5   | 0  | 0.0   |
| <i>Populus balsamifera</i>             | 1,643  | 37.8  | 7.6  | 1,690,482,472  | 240,796,617    | 87.5 | 16  | 0  | 0.0   |
| <i>Populus balsamifera trichocarpa</i> | 413    | 91.2  | 12.7 | 291,880,197    | 31,627,650     | 90.2 | 16  | 4  | 25.0  |
| <i>Populus deltoides</i>               | 994    | 114.3 | 12.7 | 464,660,439    | 103,831,578    | 81.7 | 40  | 27 | 67.5  |
| <i>Populus deltoides monilifera</i>    | 47     | 86.9  | 12.7 | 119,978,238    | 10,007,292     | 92.3 | 3   | 2  | .     |
| <i>Populus fremontii</i> *             | 40     | 99.6  | 12.7 | 19,766,406     | 6,832,552      | 74.3 | .   | .  | .     |
| <i>Populus grandidentata</i>           | 3,316  | 53.1  | 10.6 | 2,434,736,541  | 424,743,233    | 85.1 | 39  | 14 | 35.9  |
| <i>Populus heterophylla</i>            | 43     | 79.0  | 12.7 | 23,678,348     | 2,976,483      | 88.8 | 2   | 0  | .     |
| <i>Populus tremuloides</i>             | 12,672 | 41.7  | 8.3  | 34,923,138,905 | 3,832,496,927  | 90.1 | 118 | 4  | 3.4   |
| <i>Prosopis glandulosa</i>             | 5,419  | 51.3  | 10.3 | 8,631,893,641  | 1,340,805,477  | 86.6 | 26  | 1  | 3.8   |
| <i>Prosopis velutina</i> *             | 362    | 59.7  | 11.9 | 243,842,284    | 84,664,761     | 74.2 | 12  | 9  | 75.0  |
| <i>Prunus americana</i>                | 783    | 14.5  | 2.9  | 1,076,043,140  | 162,593,262    | 86.9 | 27  | 3  | 11.1  |
| <i>Prunus emarginata</i>               | 665    | 23.9  | 4.8  | 1,281,050,662  | 86,960,368     | 93.6 | 28  | 3  | 10.7  |
| <i>Prunus pensylvanica</i>             | 1,628  | 22.4  | 4.5  | 2,310,852,489  | 292,838,467    | 88.8 | 31  | 9  | 29.0  |
| <i>Prunus serotina</i>                 | 24,393 | 51.1  | 10.2 | 22,001,051,866 | 1,500,554,911  | 93.6 | 91  | 4  | 4.4   |
| <i>Pseudotsuga macrocarpa</i> *        | 14     | 121.2 | 12.7 | .              | 876,130        | 0.0  | 1   | 1  | .     |
| <i>Pseudotsuga menziesii</i>           | 18,784 | 105.9 | 12.7 | 24,536,700,133 | 5,329,791,778  | 82.2 | 128 | 40 | 31.3  |
| <i>Quercus agrifolia</i>               | 287    | 83.1  | 12.7 | 314,088,128    | 71,204,574     | 81.5 | 17  | 9  | 52.9  |

|                               |        |       |      |                |               |      |    |    |       |
|-------------------------------|--------|-------|------|----------------|---------------|------|----|----|-------|
| <i>Quercus alba</i>           | 19,675 | 64.3  | 12.7 | 20,646,218,405 | 1,912,048,103 | 91.5 | 70 | 6  | 8.6   |
| <i>Quercus arizonica</i>      | 543    | 60.2  | 12.0 | 660,866,450    | 135,895,989   | 82.9 | 16 | 6  | 37.5  |
| <i>Quercus bicolor</i>        | 410    | 81.0  | 12.7 | 118,757,606    | 31,429,385    | 79.1 | 17 | 5  | 29.4  |
| <i>Quercus buckleyi</i>       | 217    | 40.4  | 8.1  | 374,442,443    | 49,764,758    | 88.3 | 4  | 1  | .     |
| <i>Quercus chrysolepis</i>    | 1,396  | 56.6  | 11.3 | 3,515,000,337  | 417,712,527   | 89.4 | 30 | 4  | 13.3  |
| <i>Quercus coccinea</i>       | 5,303  | 67.1  | 12.7 | 2,111,143,333  | 399,245,721   | 84.1 | 38 | 10 | 26.3  |
| <i>Quercus douglasii</i> *    | 473    | 73.2  | 12.7 | 229,864,057    | 154,538,031   | 59.8 | 13 | 12 | 92.3  |
| <i>Quercus ellipsoidalis</i>  | 1,602  | 58.2  | 11.6 | 1,720,752,756  | 106,502,728   | 94.2 | 11 | 3  | 27.3  |
| <i>Quercus emoryi</i>         | 323    | 62.7  | 12.5 | 202,088,263    | 46,638,006    | 81.2 | 13 | 5  | 38.5  |
| <i>Quercus engelmannii</i> *  | 8      | 94.5  | 12.7 | 501,619        | 774,952       | 39.3 | 1  | 1  | .     |
| <i>Quercus falcata</i>        | 9,264  | 64.0  | 12.7 | 6,897,351,592  | 397,965,088   | 94.5 | 39 | 4  | 10.3  |
| <i>Quercus gambelii</i>       | 2,854  | 20.6  | 4.1  | 60,231,268,023 | 4,230,741,595 | 93.4 | 42 | 0  | 0.0   |
| <i>Quercus garryana</i>       | 513    | 57.7  | 11.5 | 1,186,289,476  | 169,025,697   | 87.5 | 20 | 5  | 25.0  |
| <i>Quercus grisea</i>         | 350    | 51.6  | 10.3 | 593,813,091    | 75,661,402    | 88.7 | 11 | 5  | 45.5  |
| <i>Quercus hypoleucoides</i>  | 109    | 46.5  | 9.3  | 355,573,751    | 29,442,470    | 92.4 | 5  | 0  | 0.0   |
| <i>Quercus imbricaria</i>     | 864    | 65.3  | 12.7 | 505,496,313    | 53,836,084    | 90.4 | 11 | 1  | 9.1   |
| <i>Quercus incana</i>         | 288    | 28.2  | 5.6  | 371,599,445    | 25,622,068    | 93.5 | 7  | 0  | 0.0   |
| <i>Quercus kelloggii</i>      | 1,211  | 78.5  | 12.7 | 1,122,472,946  | 220,511,435   | 83.6 | 19 | 6  | 31.6  |
| <i>Quercus laceyi</i> *       | 42     | 57.7  | 11.5 | 3,531,744      | 13,855,531    | 20.3 | 2  | 2  | .     |
| <i>Quercus laevis</i>         | 527    | 30.0  | 6.0  | 942,721,480    | 125,766,484   | 88.2 | 5  | 0  | 0.0   |
| <i>Quercus laurifolia</i>     | 4,040  | 61.5  | 12.3 | 6,190,261,309  | 346,143,259   | 94.7 | 14 | 1  | 7.1   |
| <i>Quercus lobata</i> *       | 96     | 124.7 | 12.7 | 6,738,616      | 11,186,381    | 37.6 | 5  | 5  | 100.0 |
| <i>Quercus lyrata</i>         | 817    | 85.3  | 12.7 | 436,779,184    | 67,353,642    | 86.6 | 14 | 5  | 35.7  |
| <i>Quercus macrocarpa</i>     | 3,075  | 77.5  | 12.7 | 1,835,253,598  | 241,318,066   | 88.4 | 42 | 17 | 40.5  |
| <i>Quercus margarettiae</i>   | 237    | 29.7  | 5.9  | 482,001,763    | 64,256,901    | 88.2 | 4  | 0  | .     |
| <i>Quercus marilandica</i>    | 2,083  | 42.7  | 8.5  | 2,106,712,657  | 312,096,415   | 87.1 | 27 | 5  | 18.5  |
| <i>Quercus michauxii</i>      | 937    | 77.2  | 12.7 | 368,410,492    | 39,617,413    | 90.3 | 14 | 3  | 21.4  |
| <i>Quercus minima</i>         | 236    | 28.2  | 5.6  | 1,077,478,438  | 70,809,328    | 93.8 | 5  | 0  | 0.0   |
| <i>Quercus muehlenbergii</i>  | 2,306  | 59.7  | 11.9 | 1,738,273,702  | 147,365,741   | 92.2 | 29 | 2  | 6.9   |
| <i>Quercus nigra</i>          | 14,336 | 56.6  | 11.3 | 20,583,048,721 | 1,065,646,228 | 95.1 | 27 | 0  | 0.0   |
| <i>Quercus oblongifolia</i> * | 32     | 69.6  | 12.7 | 2,945,510      | 4,439,051     | 39.9 | 2  | 2  | .     |
| <i>Quercus pagoda</i>         | 2,915  | 83.6  | 12.7 | 1,476,537,909  | 128,008,200   | 92.0 | 18 | 0  | 0.0   |
| <i>Quercus palustris</i>      | 625    | 95.0  | 12.7 | 201,174,082    | 54,692,829    | 78.6 | 15 | 6  | 40.0  |
| <i>Quercus phellos</i>        | 4,247  | 67.8  | 12.7 | 3,713,875,974  | 170,927,166   | 95.6 | 22 | 1  | 4.5   |
| <i>Quercus prinus</i>         | 5,991  | 69.6  | 12.7 | 5,445,542,957  | 987,002,308   | 84.7 | 32 | 8  | 25.0  |
| <i>Quercus rubra</i>          | 16,328 | 73.9  | 12.7 | 10,754,028,404 | 1,161,279,650 | 90.3 | 79 | 9  | 11.4  |
| <i>Quercus rugosa</i>         | 43     | 40.6  | 8.1  | 69,412,906     | 12,253,730    | 85.0 | 4  | 2  | .     |
| <i>Quercus shumardii</i>      | 866    | 75.9  | 12.7 | 498,277,314    | 55,809,934    | 89.9 | 22 | 1  | 4.5   |
| <i>Quercus similis</i>        | 15     | 59.9  | 12.0 | 5,437,896      | 919,392       | 85.5 | .  | .  | .     |
| <i>Quercus sinuata</i>        | 51     | 45.5  | 9.1  | 110,423,152    | 5,782,471     | 95.0 | 4  | 0  | .     |
| <i>Quercus stellata</i>       | 9,275  | 57.4  | 11.5 | 7,463,209,732  | 1,293,666,156 | 85.2 | 48 | 10 | 20.8  |
| <i>Quercus texana</i>         | 486    | 82.3  | 12.7 | 352,644,574    | 42,762,359    | 89.2 | 10 | 0  | 0.0   |

|                                       |        |       |      |                |               |      |    |    |      |
|---------------------------------------|--------|-------|------|----------------|---------------|------|----|----|------|
| <i>Quercus velutina</i>               | 11,817 | 65.8  | 12.7 | 8,775,801,997  | 765,877,053   | 92.0 | 60 | 6  | 10.0 |
| <i>Quercus virginiana</i>             | 2,630  | 64.0  | 12.7 | 7,269,148,021  | 494,321,419   | 93.6 | 25 | 1  | 4.0  |
| <i>Quercus wislizeni</i>              | 360    | 47.8  | 9.6  | 955,047,766    | 157,256,414   | 85.9 | 11 | 2  | 18.2 |
| <i>Rhizophora mangle</i>              | 34     | 12.7  | 2.5  | 1,287,305,067  | 101,476,820   | 92.7 | 2  | 0  | .    |
| <i>Robinia pseudoacacia</i>           | 2,960  | 53.3  | 10.7 | 1,557,074,005  | 279,749,341   | 84.8 | 42 | 8  | 19.0 |
| <i>Sabal palmetto</i>                 | 550    | 45.7  | 9.1  | 1,383,427,362  | 152,285,621   | 90.1 | 7  | 0  | 0.0  |
| <i>Salix amygdaloides</i>             | 99     | 52.8  | 10.6 | 163,004,940    | 3,814,461     | 97.7 | 6  | 0  | 0.0  |
| <i>Salix bebbiana</i> *               | 51     | 21.3  | 4.3  | 31,448,863     | 12,327,732    | 71.8 | 4  | 2  | .    |
| <i>Salix caroliniana</i>              | 84     | 28.2  | 5.6  | 261,118,546    | 41,077,568    | 86.4 | 5  | 1  | 20.0 |
| <i>Salix nigra</i>                    | 1,519  | 69.1  | 12.7 | 1,215,074,320  | 170,623,487   | 87.7 | 43 | 10 | 23.3 |
| <i>Sapindus saponaria drummondii</i>  | 246    | 31.2  | 6.2  | 845,536,946    | 36,812,213    | 95.8 | 11 | 1  | 9.1  |
| <i>Sassafras albidum</i>              | 8,824  | 34.0  | 6.8  | 14,218,667,208 | 656,336,923   | 95.6 | 53 | 2  | 3.8  |
| <i>Sequoia sempervirens</i>           | 304    | 158.2 | 12.7 | 571,425,131    | 165,432,285   | 77.5 | 8  | 4  | 50.0 |
| <i>Sequoiadendron giganteum</i> *     | 6      | 190.5 | 12.7 | .              | 642,261       | 0.0  | .  | .  | .    |
| <i>Sideroxylon lanuginosum</i>        | 1,355  | 22.6  | 4.5  | 2,508,900,578  | 159,429,537   | 94.0 | 24 | 1  | 4.2  |
| <i>Sophora affinis</i>                | 19     | 22.1  | 4.4  | 23,043,677     | 3,682,150     | 86.2 | 2  | 0  | .    |
| <i>Sorbus americana</i>               | 769    | 24.1  | 4.8  | 727,063,542    | 43,684,958    | 94.3 | 15 | 2  | 13.3 |
| <i>Sorbus decora</i>                  | 19     | 19.8  | 4.0  | 5,642,456      | 658,998       | 89.5 | 1  | 0  | .    |
| <i>Taxodium ascendens</i>             | 863    | 48.5  | 9.7  | 2,563,874,699  | 425,846,359   | 85.8 | 8  | 4  | 50.0 |
| <i>Taxodium distichum</i> *           | 1,227  | 103.1 | 12.7 | 698,154,187    | 247,087,517   | 73.9 | 15 | 11 | 73.3 |
| <i>Taxus brevifolia</i>               | 799    | 31.2  | 6.2  | 851,054,488    | 59,815,005    | 93.4 | 22 | 3  | 13.6 |
| <i>Thuja occidentalis</i>             | 3,448  | 46.0  | 9.2  | 11,508,672,026 | 1,564,943,834 | 88.0 | 20 | 7  | 35.0 |
| <i>Thuja plicata</i>                  | 3,017  | 96.5  | 12.7 | 5,047,400,503  | 413,998,286   | 92.4 | 27 | 1  | 3.7  |
| <i>Tilia americana</i>                | 5,455  | 65.5  | 12.7 | 1,943,067,620  | 438,993,477   | 81.6 | 58 | 22 | 37.9 |
| <i>Tilia americana caroliniana</i>    | 96     | 69.9  | 12.7 | 26,376,429     | 6,263,962     | 80.8 | 5  | 2  | 40.0 |
| <i>Tilia americana heterophylla</i> * | 37     | 61.2  | 12.2 | 7,200,971      | 3,074,222     | 70.1 | 3  | 1  | .    |
| <i>Torreya californica</i>            | 43     | 38.9  | 7.8  | 89,345,683     | 7,530,663     | 92.2 | 4  | 0  | .    |
| <i>Tsuga canadensis</i>               | 5,724  | 62.0  | 12.4 | 7,984,863,710  | 1,113,014,822 | 87.8 | 41 | 10 | 24.4 |
| <i>Tsuga caroliniana</i>              | 17     | 59.9  | 12.0 | 11,185,729     | 734,986       | 93.8 | 1  | 0  | .    |
| <i>Tsuga heterophylla</i>             | 4,689  | 74.2  | 12.7 | 14,094,753,791 | 943,302,416   | 93.7 | 29 | 2  | 6.9  |
| <i>Tsuga mertensiana</i>              | 1,326  | 75.7  | 12.7 | 2,779,381,570  | 327,722,246   | 89.5 | 16 | 3  | 18.8 |
| <i>Ulmus alata</i>                    | 12,079 | 30.5  | 6.1  | 20,022,543,284 | 1,601,276,842 | 92.6 | 40 | 0  | 0.0  |
| <i>Ulmus americana</i>                | 14,152 | 48.0  | 9.6  | 9,764,089,779  | 1,132,731,809 | 89.6 | 91 | 6  | 6.6  |
| <i>Ulmus crassifolia</i>              | 974    | 44.7  | 8.9  | 2,566,288,115  | 216,049,769   | 92.2 | 14 | 0  | 0.0  |
| <i>Ulmus rubra</i>                    | 6,073  | 39.9  | 8.0  | 6,772,638,432  | 369,620,910   | 94.8 | 56 | 3  | 5.4  |
| <i>Ulmus serotina</i> *               | 7      | 24.9  | 5.0  | 1,323,092      | 2,164,378     | 37.9 | .  | .  | .    |
| <i>Ulmus thomasi</i>                  | 43     | 45.2  | 9.0  | 27,490,989     | 2,268,911     | 92.4 | 1  | 0  | .    |
| <i>Umbellularia californica</i>       | 565    | 56.4  | 11.3 | 975,325,416    | 103,051,886   | 90.4 | 19 | 1  | 5.3  |
